# Supplementary material for: In situ measurements of micronutrient dynamics in open seawater show that complex dissociation rates may limit diatom growth
Source: PubMed Central journal article supplement (PMC6208410; doi:10.1038/s41598-018-34465-w), 2018-10-31

*In situ* measurements of micronutrient dynamics in open seawater show that complex dissociation rates may limit diatom growth.

Willy Baeyens<sup>1\*</sup>, Yue Gao<sup>1</sup>, William Davison<sup>2</sup>, Josep Galceran<sup>3</sup>, Martine Leermakers<sup>1</sup>, Jaume Puy<sup>3</sup>, Pierre-Jean Superville<sup>1,4</sup>, Laurent Beguery<sup>5</sup>.

Figure S1: Cruise track of the SeaExplorer glider in the Mediterranean Sea from Isle du Levant to Corsica and back.

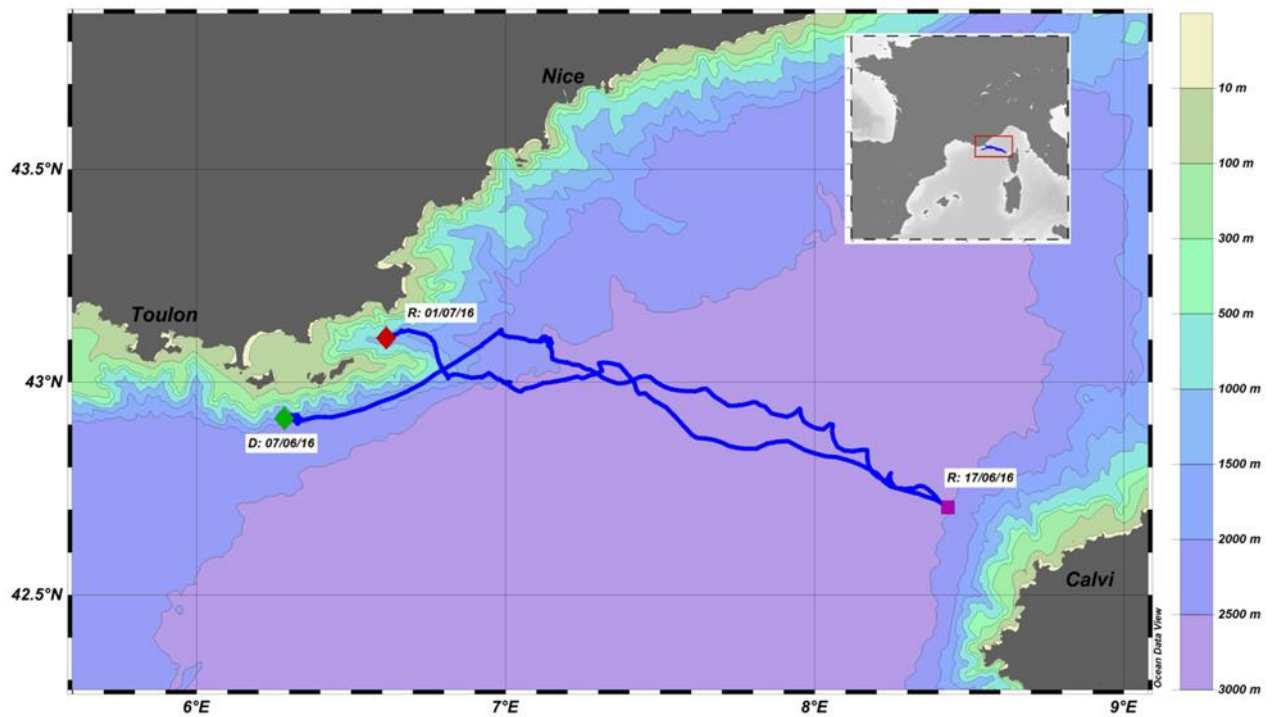

Supplement: 41598_2018_34465_MOESM1_ESM.pdf [file 41598_2018_34465_MOESM1_ESM.pdf]
