# Supplementary material for: In situ measurements of micronutrient dynamics in open seawater show that complex dissociation rates may limit diatom growth
Source: PubMed Central journal article supplement (PMC6208410; doi:10.1038/s41598-018-34465-w), 2018-10-31
Supplement: 41598_2018_34465_MOESM2_ESM.pdf [file 41598_2018_34465_MOESM2_ESM.pdf]

*In situ* measurements of micronutrient dynamics in open seawater show that complex dissociation rates may limit diatom growth.

Willy Baeyens<sup>1\*</sup>, Yue Gao<sup>1</sup>, William Davison<sup>2</sup>, Josep Galceran<sup>3</sup>, Martine Leermakers<sup>1</sup>, Jaume Puy<sup>3</sup>, Pierre-Jean Superville<sup>1,4</sup>, Laurent Beguery<sup>5</sup>.

Figure S2: Cellular quotas (from Twining et al., 2011; 2015) and seawater concentrations of Fe (from Moore and Braucher, 2007 and Pinedo-Gonzalez et al., 2015), Co (from Pinedo-Gonzalez et al., 2015) and Mn (from Pohl et al., 2011; Butler et al., 2013; Bruland et al., 1994) in various oceanic basins.

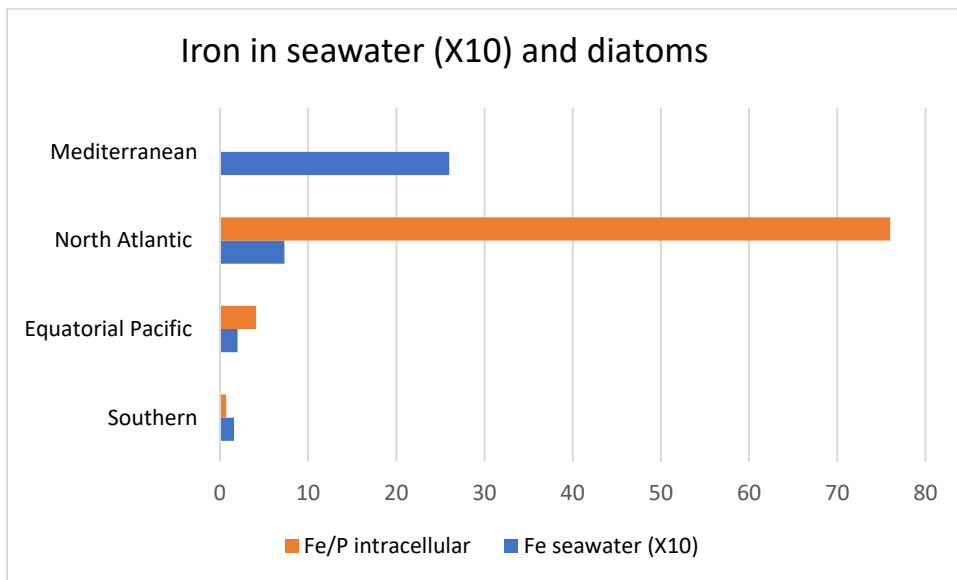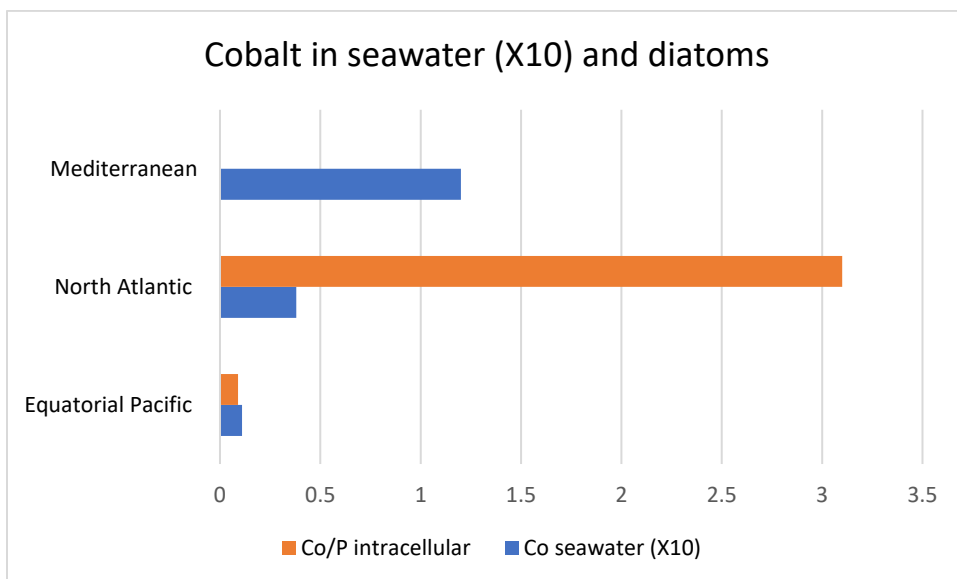

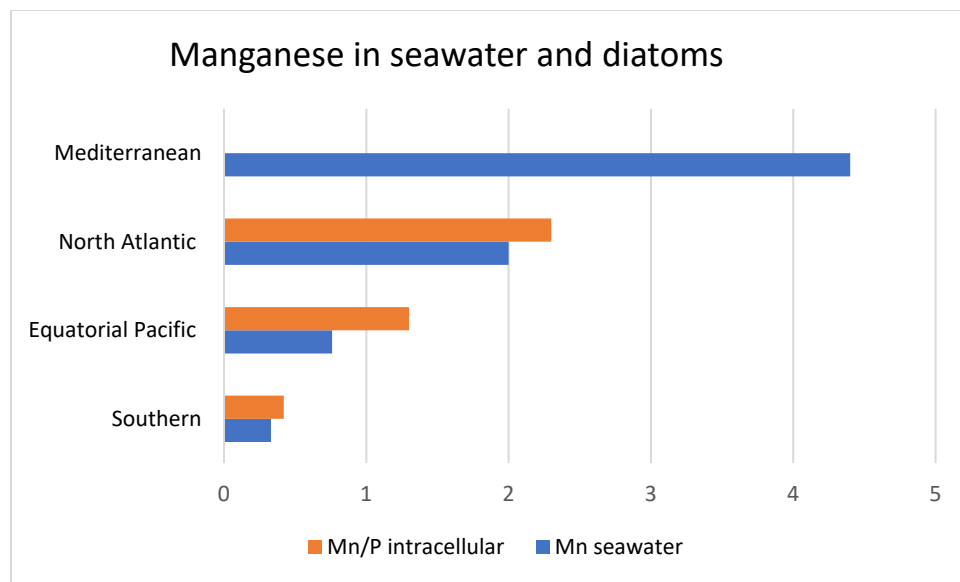

#### References:

- Bruland, K. W., Orions, K. J. & Cowen, J. P. Reactive trace metals in the stratified central North Pacific. *Geochim. Cosmochim. Acta* **58**, 3171-3182 (1994).
- Butler, E. C. V. *et al.* Trace metals Cd, Co, Cu, Ni, and Zn in waters of the subantarctic and Polar Frontal Zones south of Tasmania during the 'SAZ-Sense' project. *Mar. Chem.* **148**, 63–76 (2013).
- Moore, J. K. & Braucher, O. Observations of dissolved iron concentrations in the World Ocean: implications and constraints for ocean biogeochemical models. *Biogeosci. Discuss.* **4**, 1241-1277 (2007).
- Pinedo-Gonzalez, P. *et al.* Surface distribution of dissolved trace metals in the oligotrophic ocean and their influence on phytoplankton biomass and productivity. *Global Biogeochem. Cycles* **29**, 1763-1781 (2015).
- Pohl, C. *et al.* Synoptic transects on the distribution of trace elements (Hg, Pb, Cd, Cu, Ni, Zn, Co, Mn, Fe, and Al) in surface waters of the Northern- and Southern East Atlantic. *J. Mar. Syst.* **84**, 28-41 (2011).
- Twining, B. S. *et al.* Metal quotas of plankton in the equatorial Pacific Ocean. *Deep Sea Research Part II: Topical Studies in Oceanography* **58**, 325-341 (2011).
- Twining, B. S., Rauschenberg, S., Morton, P. L. & Vogt, S. Metal contents of phytoplankton and labile particulate material in the North Atlantic Ocean. *Prog. Oceanog.* **137**, 261-283 (2015).
