# Supplementary material for: In situ measurements of micronutrient dynamics in open seawater show that complex dissociation rates may limit diatom growth
Source: PubMed Central journal article supplement (PMC6208410; doi:10.1038/s41598-018-34465-w), 2018-10-31
Supplement: 41598_2018_34465_MOESM3_ESM.pdf [file 41598_2018_34465_MOESM3_ESM.pdf]

*In situ* measurements of micronutrient dynamics in open seawater show that complex dissociation rates may limit diatom growth.

Willy Baeyens<sup>1\*</sup>, Yue Gao<sup>1</sup>, William Davison<sup>2</sup>, Josep Galceran<sup>3</sup>, Martine Leermakers<sup>1</sup>, Jaume Puy<sup>3</sup>, Pierre-Jean Superville<sup>1,4</sup>, Laurent Beguery<sup>5</sup>.

Table S1:  $c_{DGT}$  results obtained with classic (0.1125 cm diffusive domain) and fast (0.0325 cm diffusive domain) DGTs and at the head and the tail of the glider. Concentrations in nM.

|                  | Cd    | Mn   | Co    | Ni   | Cu   | Fe   |
|------------------|-------|------|-------|------|------|------|
| Head DGT-fast    | 0.049 | 0.97 | 0.058 | 2.96 | 0.41 | 0.47 |
| RSD              | 6%    | 17%  | 8%    | 9%   | 9%   | 33%  |
| Head DGT-classic | 0.062 | 1.69 | 0.064 | 3.2  | 0.94 |      |
| RSD              | 14%   | 19%  | 12%   | 13%  | 19%  |      |
| Tail DGT-classic | 0.061 | 1.25 | 0.062 | 3.1  | 0.73 |      |
| RSD              | 18%   | 13%  | 13%   | 10%  | 2%   |      |
