# Supplementary material for: In situ measurements of micronutrient dynamics in open seawater show that complex dissociation rates may limit diatom growth
Source: PubMed Central journal article supplement (PMC6208410; doi:10.1038/s41598-018-34465-w), 2018-10-31
Supplement: 41598_2018_34465_MOESM4_ESM.pdf [file 41598_2018_34465_MOESM4_ESM.pdf]

*In situ* measurements of micronutrient dynamics in open seawater show that complex dissociation rates may limit diatom growth.

Willy Baeyens<sup>1\*</sup>, Yue Gao<sup>1</sup>, William Davison<sup>2</sup>, Josep Galceran<sup>3</sup>, Martine Leermakers<sup>1</sup>, Jaume Puy<sup>3</sup>, Pierre-Jean Superville<sup>1,4</sup>, Laurent Beguery<sup>5</sup>.

Table S2: Composition of parts of the SeaExplorer. Al, Si and S (in %), other elements (in  $\mu\text{g g}^{-1}$ ) in (1) Anodized plate and (2) Al plate. Trace metals in polyurethane (PU) material and in leaching solutions. Concentrations in  $\mu\text{g g}^{-1}$ .

|                     | Al | Si                   | S     | Cd    | Mn    | Fe    | Co    | Ni | Cu   | Zn  |
|---------------------|----|----------------------|-------|-------|-------|-------|-------|----|------|-----|
| (1)                 | 75 | 4.50                 | 18.6  | 0.11  | 312   | 2270  | 1.87  | 33 | 1620 | 359 |
| (2)                 | 99 | 0.01                 | 0.02  | 0.08  | 291   | 1940  | 1.43  | 24 | 1460 | 196 |
|                     |    |                      |       | Cd    | Mn    | Fe    | Co    | Ni | Cu   |     |
| PU                  |    | 0.0039               | 4.0   | 114   | 0.026 | 0.388 | 0.391 |    |      |     |
| HCl 0.1N            |    | 0.00092              | 0.014 | 0.755 | 0.001 | 0.028 | 0.081 |    |      |     |
| HAc 1M              |    | $9.7 \times 10^{-5}$ | 0.011 | 0.292 | 0.000 | 0.013 | 0.027 |    |      |     |
| HNO <sub>3</sub> 1M |    | 0.00058              | 0.020 | 0.699 | 0.002 | 0.039 | 0.100 |    |      |     |
